# Supplementary material for: Fire ants perpetually rebuild sinking towers
Source: R Soc Open Sci. 2017 Jul 12;4(7):170475. doi: 10.1098/rsos.170475 (PMC5541565; doi:10.1098/rsos.170475)
Supplement: Slot Time distribution AntTower [file rsos170475supp2.xlsx]

## Sheet: Combine Data
9.5mm		4.7mm		Slot fill time per each rod diameter
34		3
17		128
5		100
61		135
107		1
246		5
24		15
108		143
27		110
86		37
38		17
96		80
109		89
48		10
45		23
9		82
43		215
68		15
16		19
2		34
1		11
172		97
30		113
30		97
52		51
122		10
52		74
196		62
66		90
25		16
48		136
63		61
50		20
104		139
157		4
12		43
75		9
3		35
1		17
38		70
122		68
68		3
172		228
164		72
1		68
80		44
1		101
75		17
7		8
14		238
91		88

## Sheet: 9.5mm data
Slot Distribution		9.5 mm rod
Ants	Time free slot	Time filled	time to fill slot			Description		Video
			t_i	t_i										t (sec)	# of occurances
	min	min	mins	secs								Avg	64.3333
1	9.85	10.4167	0.566667	34		Middle		06022014_9.5mm close up				Stdev	57.132	1	4
2	10.3833	10.6667	0.283333	17		Middle		06022014_9.5mm close up						2	1
3	10.55	10.6333	0.0833333	5		Middle		06022014_9.5mm close up						3	1
4	13.1	14.1167	1.01667	61		left		06022014_9.5mm close up						5	1
5	10.4667	12.25	1.78333	107		left		06022014_9.5mm close up						7	1
6	14.5167	18.6167	4.1	246		right		06022014_9.5mm close up						9	1
7	14.0167	14.4167	0.4	24		right		06022014_9.5mm close up						12	1
8	10.5167	12.3167	1.8	108		right		06022014_9.5mm close up						14	1
9	10.35	10.8	0.45	27		middle		06022014_9.5mm close up						16	1
10	10.9	12.3333	1.43333	86		left		06022014_9.5mm close up						17	2
11	11.4667	12.1	0.633333	38		right		06022014_9.5mm close up						24	1
12	10.6667	12.2667	1.6	96		left		06022014_9.5mm close up						25	2
13	11.3333	13.15	1.81667	109		m		06022014_9.5mm close up						27	1
14	1.76667	2.56667	0.8	48		m-l		06042014_9.5mm close up 2						30	2
15	1.65	2.4	0.75	45		m-l		06042014_9.5mm close up 2						34	1
16	2.7	2.85	0.15	9		l		06042014_9.5mm close up 2						38	2
17	4.45	5.16667	0.716667	43		m		06042014_9.5mm close up 2						43	1
18	4.03333	5.16667	1.13333	68		m		06042014_9.5mm close up 2						45	1
19	0.25	0.516667	0.266667	16		m-b		06042014_9.5mm close up 2						48	2
20	2.18333	2.21667	0.0333333	2		m-t		06042014_9.5mm close up 2						50	1
21	1.96667	1.98333	0.0166667	1		m		06042014_9.5mm close up 2						52	2
22	3.1	5.96667	2.86667	172		m-t		06042014_9.5mm close up 2						61	1
23	0.183333	0.683333	0.5	30		m-b		06042014_9.5mm close up 2						63	1
24	13.85	14.35	0.5	30		m-l		06042014_9.5mm close up 2						66	1
25	8.95	9.81667	0.866667	52		m-l		06042014_9.5mm close up 2						68	2
26	8.95	10.9833	2.03333	122		m		06042014_9.5mm close up 2						75	2
27	11.6833	12.55	0.866667	52		m		06042014_9.5mm close up 2						80	1
28	18.9	22.1667	3.26667	196		m		06042014_9.5mm close up 2						86	1
29	22.1667	23.2667	1.1	66		m		06042014_9.5mm close up 2						91	1
30	1.75	2.16667	0.416667	25		m		06042014_9.5mm close up 2						96	1
31	1.71667	2.51667	0.8	48		m-b		06042014_9.5mm close up 2						104	1
32	22.5333	23.5833	1.05	63		m-r		06042014_9.5mm close up 2						107	1
33	2.68333	3.51667	0.833333	50		m		06042014_9.5mm close up 1						108	1
34	1.41667	3.15	1.73333	104		m		06042014_9.5mm close up 1						109	1
35	4.18333	6.8	2.61667	157		m-l		06042014_9.5mm close up 1						122	2
36	1.78333	1.98333	0.2	12		m		06042014_9.5mm close up 1						157	1
37	11.1333	12.3833	1.25	75		m		06042014_9.5mm close up 1						164	1
38	12.3833	12.4333	0.05	3		m		06042014_9.5mm close up 1						172	2
39	24.4667	24.4833	0.0166667	1		m-r		06042014_9.5mm close up 1						196	1
40	16.6167	17.25	0.633333	38		m-l		06042014_9.5mm close up 1						246	1
41	12.1167	14.15	2.03333	122		m-r		06042014_9.5mm close up 1
42	5.88333	7.01667	1.13333	68		m		06062014_9.5mm close up 1
43	8.35	11.2167	2.86667	172		m		06062014_9.5mm close up 1
44	13.0667	15.8	2.73333	164		m-t		06062014_9.5mm close up 1
45	12.7833	12.8	0.0166667	1		m-t		06062014_9.5mm close up 1
46	10.95	12.2833	1.33333	80		m-t		06062014_9.5mm close up 1
47	24.15	24.1667	0.0166667	1		m-r		06062014_9.5mm close up 1
48	28.3167	29.5667	1.25	75		m-l		06062014_9.5mm close up 1
49	16.8667	16.9833	0.116667	7		m-l		06062014_9.5mm close up 1
50	10.3167	10.55	0.233333	14		m-b		06062014_9.5mm close up 1
51	10.5167	12.0333	1.51667	91		m-t		06062014_9.5mm close up 1

## Sheet: 4.7mm data
Slot Distribution		4.7 mm rod
Ants	Time free slot	Time filled	time to fill slot			Description		Video
			t_i	t_i										t (sec)	# of occurances
	min	min	mins	secs								Avg	65.7059
1	9.31667	9.36667	0.05	3		m		06062014_4.7mm_close up 1				Stdev	59.0292
2	9.36667	11.5	2.13333	128		m		06062014_4.7mm_close up 1
3	23.6	25.2667	1.66667	100		m-t		06062014_4.7mm_close up 1
4	7.38333	9.63333	2.25	135		m		06062014_4.7mm_close up 1
5	2.38333	2.4	0.0166667	1		m-b		06112014_4.7mm_close up 1
6	2.85	2.93333	0.0833333	5		m-r		06112014_4.7mm_close up 1
7	5.43333	5.68333	0.25	15		m-l		06112014_4.7mm_close up 1
8	11.2167	13.6	2.38333	143		m-t		06112014_4.7mm_close up 1
9	11.1833	13.0167	1.83333	110		m-l		06112014_4.7mm_close up 1
10	12.9	13.5167	0.616667	37		t		06112014_4.7mm_close up 1
11	5.31667	5.6	0.283333	17		m-r		06112014_4.7mm_close up 1
12	6.25	7.58333	1.33333	80		m-r		06112014_4.7mm_close up 1
13	13.4167	14.9	1.48333	89		m-t		06112014_4.7mm_close up 1
14	2.45	2.61667	0.166667	10		b-l		06122014_4.7mm_close up 1
15	4.03333	4.41667	0.383333	23		b		06122014_4.7mm_close up 1
16	7.33333	8.7	1.36667	82		t		06122014_4.7mm_close up 1
17	9.15	12.7333	3.58333	215		m-l		06122014_4.7mm_close up 1
18	13.9167	14.1667	0.25	15		m-r		06122014_4.7mm_close up 1
19	14.4667	14.7833	0.316667	19		m-r		06122014_4.7mm_close up 1
20	13.85	14.4167	0.566667	34		m-t		06122014_4.7mm_close up 1
21	10.2	10.3833	0.183333	11		m-l		06122014(2)_4.7mm_close up 1
22	10.4667	12.0833	1.61667	97		l		06122014(2)_4.7mm_close up 1
23	14.3667	16.25	1.88333	113		m		06122014(2)_4.7mm_close up 1
24	14.1167	15.7333	1.61667	97		m-l		06122014(2)_4.7mm_close up 1
25	2.08333	2.93333	0.85	51		b-m		06122014(2)_4.7mm_close up 1
26	6.01667	6.18333	0.166667	10		m-l		06122014(3)_4.7mm_close up 1
27	7.4	8.63333	1.23333	74		r		06122014(3)_4.7mm_close up 1
28	5.23333	6.26667	1.03333	62		b-l		06122014(3)_4.7mm_close up 1
29	7.16667	8.66667	1.5	90		r		06122014(3)_4.7mm_close up 1
30	2.33333	2.6	0.266667	16		m		06132014(3)_4.7 mm Rod Close Up_Part 1
31	2.6	4.86667	2.26667	136		t-r		06132014(3)_4.7 mm Rod Close Up_Part 1
32	5.55	6.56667	1.01667	61		t-r		06132014(3)_4.7 mm Rod Close Up_Part 1
33	5.53333	5.86667	0.333333	20		t		06132014(3)_4.7 mm Rod Close Up_Part 1
34	2.7	5.01667	2.31667	139		t-m		06132014(3)_4.7 mm Rod Close Up_Part 1
35	5.61667	5.68333	0.0666667	4		t-m		06132014(3)_4.7 mm Rod Close Up_Part 1
36	5.68333	6.4	0.716667	43		t-m		06132014(3)_4.7 mm Rod Close Up_Part 1
37	2.88333	3.03333	0.15	9		l		06132014(4)_4.7 mm Rod Close Up_Part 1
38	4.08333	4.66667	0.583333	35		r		06132014(4)_4.7 mm Rod Close Up_Part 1
39	4.61667	4.9	0.283333	17		m-r		06162014(2)_4.7mm Rod Close Up - part 1
40	5.03333	6.2	1.16667	70		m-l		06162014(2)_4.7mm Rod Close Up - part 1
41	7.96667	9.1	1.13333	68		m-t		06162014(2)_4.7mm Rod Close Up - part 1
42	11.4167	11.4667	0.05	3		m-t		06162014(2)_4.7mm Rod Close Up - part 1
43	11.4667	15.2667	3.8	228		m-t		06162014(2)_4.7mm Rod Close Up - part 1
44	5.35	6.55	1.2	72		l		06162014(3)_4.7mm Rod Close Up - part 1
45	5.63333	6.76667	1.13333	68		m		06162014(3)_4.7mm Rod Close Up - part 1
46	6.38333	7.11667	0.733333	44		m-t		06162014(3)_4.7mm Rod Close Up - part 1
47	6.38333	8.06667	1.68333	101		m-t		06162014(3)_4.7mm Rod Close Up - part 1
48	2.03333	2.31667	0.283333	17		m-r		06162014(4)_4.7mm Rod Close Up - part 1
49	1.5	1.63333	0.133333	8		m-t		06162014(4)_4.7mm Rod Close Up - part 1
50	1.5	5.46667	3.96667	238		m-t		06162014(4)_4.7mm Rod Close Up - part 1
51	18.2833	19.75	1.46667	88		m-l		06162014(4)_4.7mm Rod Close Up - part 1
